# Supplementary material for: Is there an aerosol signature of chemical cloud processing?
Source: Copernicus journal article supplement (doi:10.5194/acp-18-16099-2018), 2018-11-08
Supplement: Supplementary file 1 [file acp-18-16099-2018-supplement.pdf]

Supplement of Atmos. Chem. Phys., 18, 16099–16119, 2018  
<https://doi.org/10.5194/acp-18-16099-2018-supplement>  
© Author(s) 2018. This work is distributed under  
the Creative Commons Attribution 4.0 License.

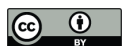

*Supplement of*

## **Is there an aerosol signature of chemical cloud processing?**

**Barbara Ervens et al.**

*Correspondence to:* Barbara Ervens ([barbara.ervens@uca.fr](mailto:barbara.ervens@uca.fr)) and Armin Sorooshian ([armin@email.arizona.edu](mailto:armin@email.arizona.edu))

The copyright of individual parts of the supplement might differ from the CC BY 4.0 License.

This supplemental information includes:

**Table S1:** Initial gas-phase mixing ratios [ppb] used as input for the parcel model. Data are from SEACR<sup>4</sup>S for six different air masses.

**Figure S1:** Predicted relative mass concentration increase due to cloud processing in six air masses as identified during SEAC<sup>4</sup>RS. Black symbols show the measured, initial size distributions; colored symbols are model results, color-coded by absolute mass increase /  $\text{ng m}^{-3}$ .

**Figure S2:** Predicted relative mass concentration increase due to cloud processing in six air masses as identified during SEAC<sup>4</sup>RS. Black symbols show the measured, initial size distributions; colored symbols are model results, color-coded by O/C ratio.

**Table S1:** Initial gas-phase mixing ratios [ppb].

|                                  | Marine | Urban | Biomass<br>Burning | Agric<br>biomass<br>burning | Back-<br>ground | Biogenic |
|----------------------------------|--------|-------|--------------------|-----------------------------|-----------------|----------|
| SO <sub>2</sub>                  | 0.43   | 0.56  | 0.252              | 1.44                        | 0.64            | 0.582    |
| NO                               | 0.028  | 0.2   | 0.137              | 0.352                       | 0.112           | 0.062    |
| NO <sub>2</sub>                  | 0.066  | 1.196 | 0.311              | 2.37                        | 0.521           | 0.283    |
| HCHO                             | 0.883  | 2.64  | 4.04               | 14.4                        | 2.8             | 4.2      |
| H <sub>2</sub> O <sub>2</sub>    | 1.172  | 2.58  | 3.72               | 4.3                         | 2.6             | 2.8      |
| O <sub>3</sub>                   | 27     | 57    | 68                 | 63                          | 57              | 50       |
| Isoprene                         | 0.003  | 0.14  | 0.18               | 1.13                        | 0.147           | 1.61     |
| Monoterpenes                     | 0.007  | 0.03  | 0.098              | 0.328                       | 0.039           | 0.123    |
| Methylvinyl ketone <sup>1)</sup> | 0.008  | 0.124 | 0.113              | 0.33                        | 0.18            | 1.1      |
| Methacrolein <sup>1)</sup>       | 0.008  | 0.124 | 0.113              | 0.33                        | 0.18            | 1.1      |
| Toluene                          | 0.009  | 0.07  | 0.125              | 0.243                       | 0.041           | 0.056    |
| Xylene <sup>2)</sup>             | 0.005  | 0.035 | 0.067              | 0.12                        | 0.02            | 0.028    |
| Ethylene                         | 0.0486 | 0.215 | 0.842              | 2.68                        | 0.212           | 0.191    |

<sup>1)</sup> The total of methyl vinyl ketone and methacrolein was measured by PTRMS. For model purposes, the total was equally split between the two compounds.

<sup>2)</sup> Xylene measurements were not available. The mixing ratio was assumed to be 50% toluene.

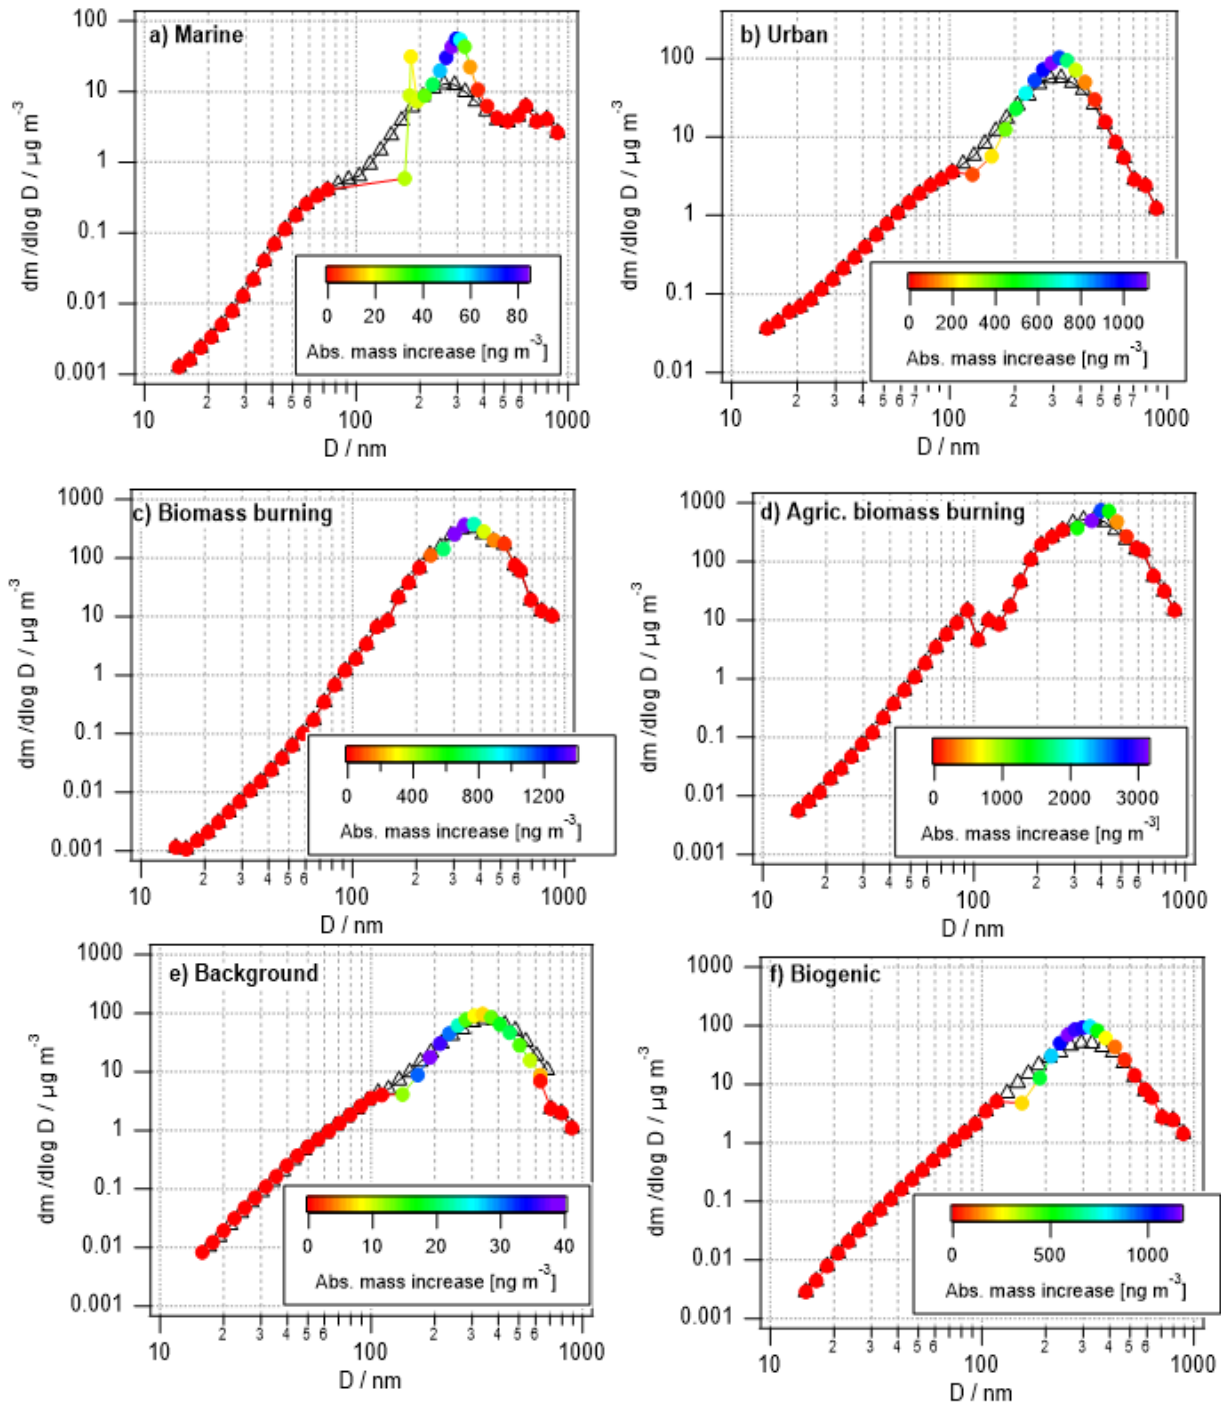

**Figure S1:** Measured initial (black) and predicted cloud-processed (colored) mass distributions of aerosol particles in six air masses as identified during SEAC<sup>4</sup>RS. Color-coding refers to the predicted absolute mass increase.

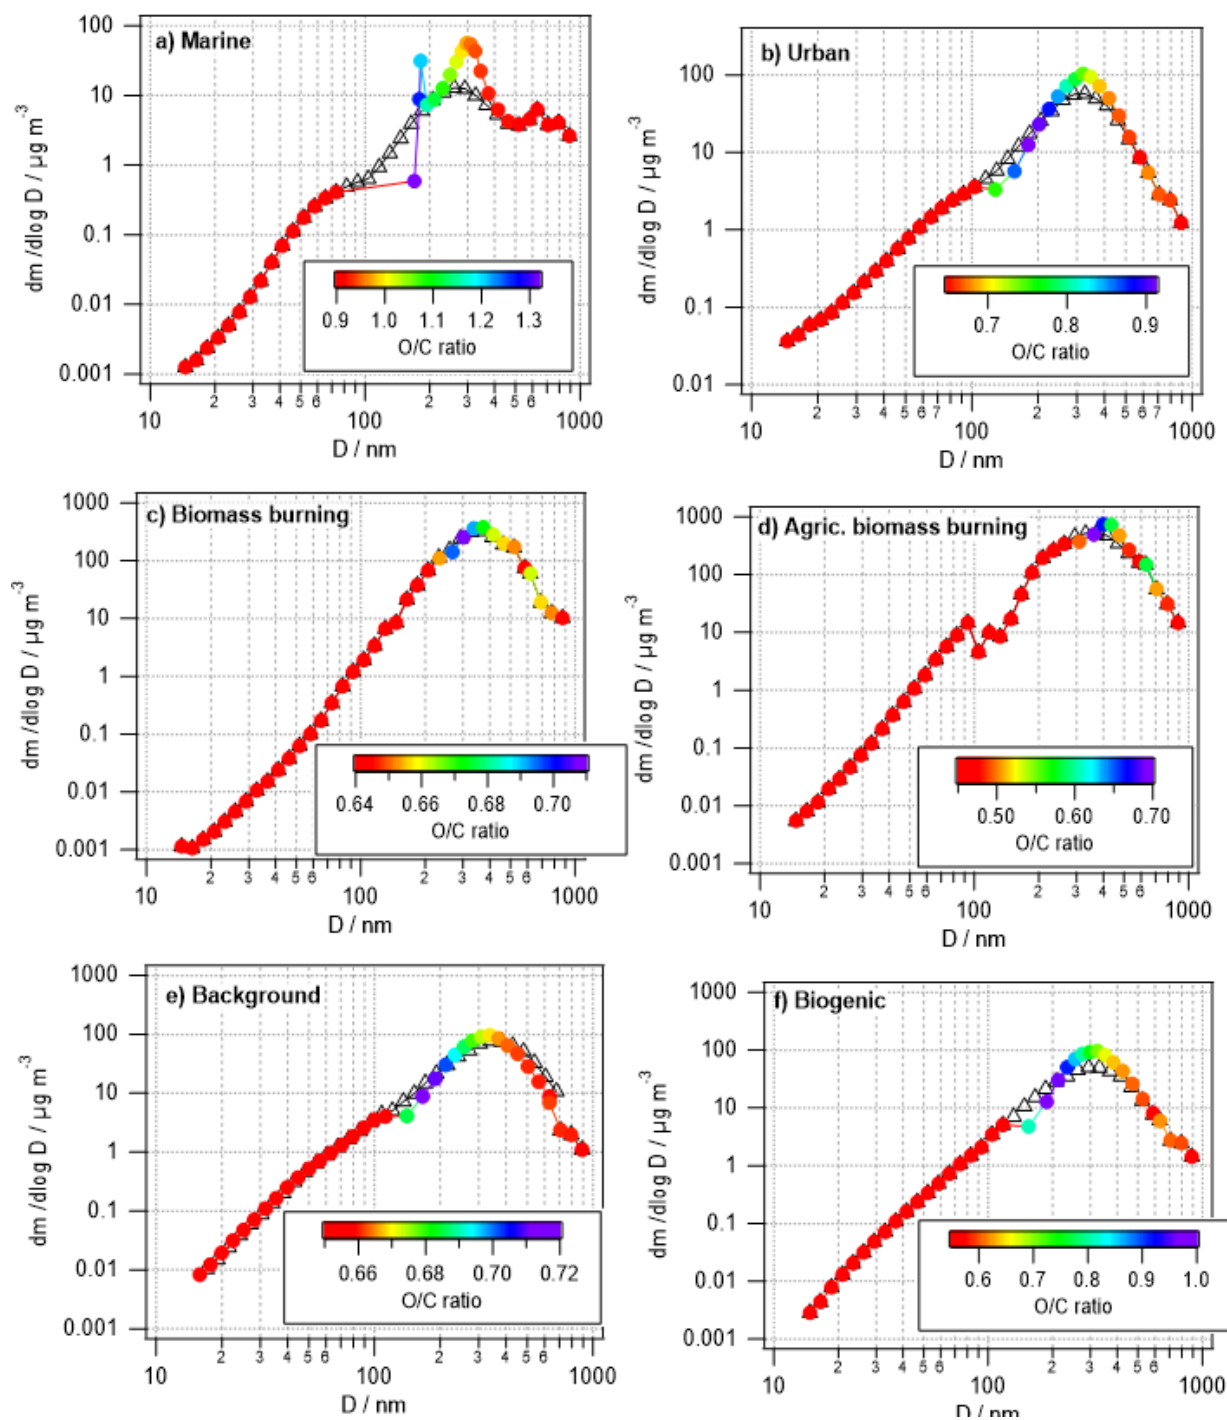

**Figure S2:** Measured initial (black) and predicted cloud-processed (colored) mass distributions of aerosol particles in six air masses as identified during SEAC<sup>4</sup>RS. Color-coding refers to the predicted O/C ratio.
